# Supplementary material for: Double negative T cells mediate Lag3-dependent antigen-specific protection in allergic asthma
Source: PubMed Central journal article supplement (PMC6751182; doi:10.1038/s41467-019-12243-0), 2019-09-18
Supplement: 41467_2019_12243_MOESM1_ESM.pdf [file 41467_2019_12243_MOESM1_ESM.pdf]

**Double negative T cells mediate Lag3-dependent antigen-specific protection in  
allergic asthma**

**Tian et al.**

## Supplementary Figure 1

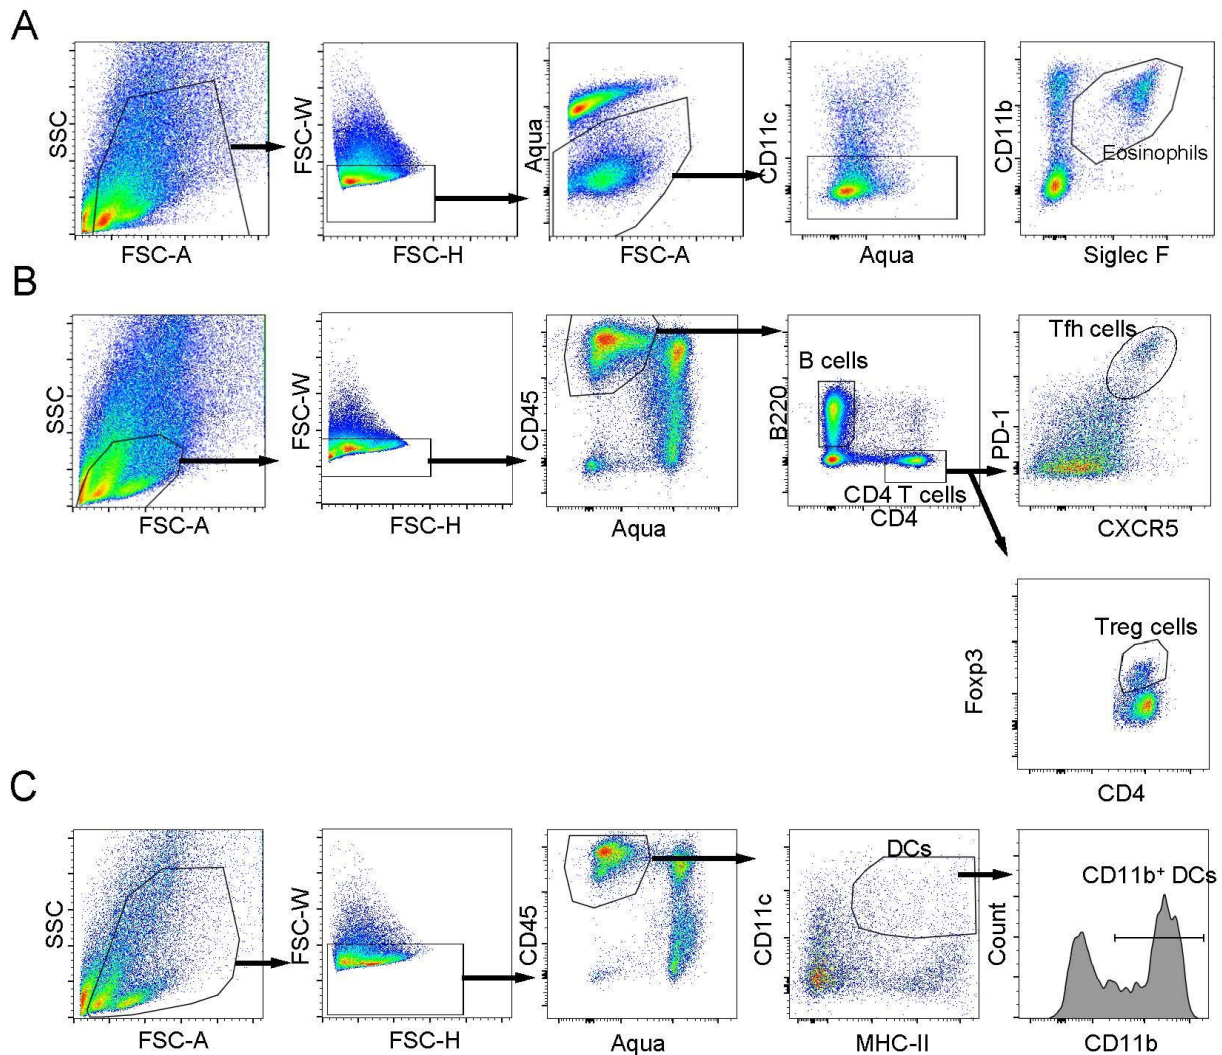

### Supplementary Figure 1. Gating strategies of flow cytometry.

(A) Gating strategy to detect lung eosinophils (Siglec F<sup>+</sup>CD11b<sup>+</sup>CD11c<sup>+</sup>) presented on Fig. 1E, Fig. 5B and Fig. 6D. (B) Gating strategy to detect lung DCs (CD11c<sup>+</sup> MHC-II<sup>+</sup>) and CD11b<sup>+</sup> DCs (CD11c<sup>+</sup> MHC-II<sup>+</sup>CD11b<sup>+</sup>) presented on Fig. 4CD, Fig. 5C and Fig. 6E. (C) Gating strategy to detect lung Tfh cells (CD4<sup>+</sup>B220<sup>-</sup> CXCR5<sup>+</sup> PD-1<sup>+</sup>), B cells (CD4<sup>+</sup>B220<sup>+</sup>) and Treg cells (CD4<sup>+</sup>B220<sup>-</sup> Foxp3<sup>+</sup>) presented on Fig. 4ABE, Fig. 5D and Fig. 6F.

## Supplementary Figure 2

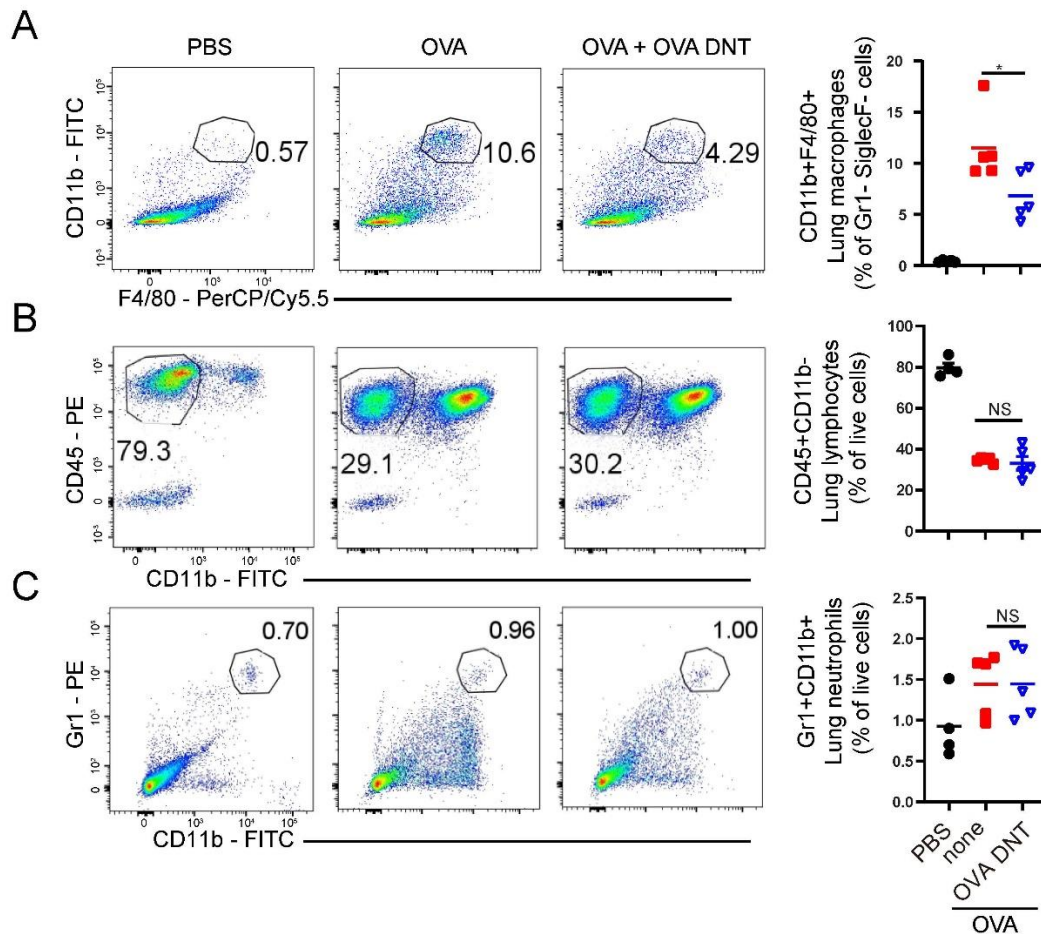

**Supplementary Figure 2. The proportion of macrophage, lymphocytes and neutrophils in lungs after DNTs treatment.**

Mice received  $2 \times 10^6$  OVA DNTs by intravenous adoptive transfer after the first 1% OVA aerosol challenge on day 28. The mice were challenged daily for the next two days and sacrificed 48 hours after the last aerosol challenge. The percentages of (A) macrophages ( $F4/80^+CD11b^+Gr1^-SiglecF^-$ ), (B) lymphocytes ( $CD45^+CD11b^-$ ) and (C) neutrophils ( $CD11b^+Gr1^+$ ) in the lung were assessed by flow cytometry. Data are shown as the mean  $\pm$  SEM;  $n = 4-5$  mice per group. One-way ANOVA was used to calculate significance. \*  $P < 0.05$ .

# Supplementary Figure 3

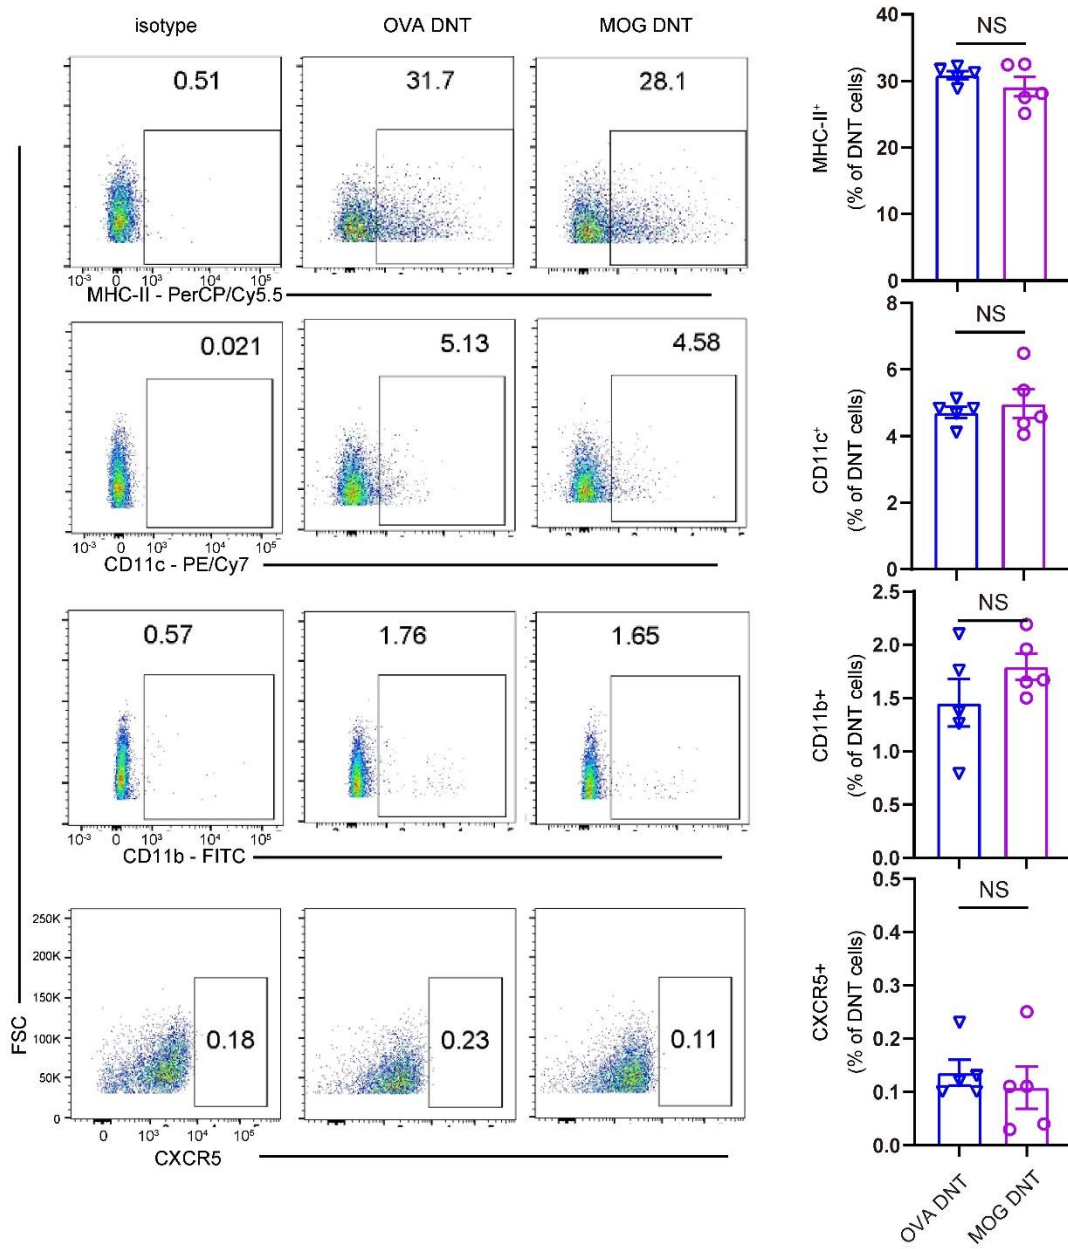

**Supplementary Figure 3. MHC-II, CD11c, CD11b and CXCR5 expression of OVA DNT and MOG DNT cells was assessed by flow cytometry. Data are shown as the mean  $\pm$  SEM; n = 5 mice per group. Student *t* test was used to calculate significance.**

# Supplementary Figure 4

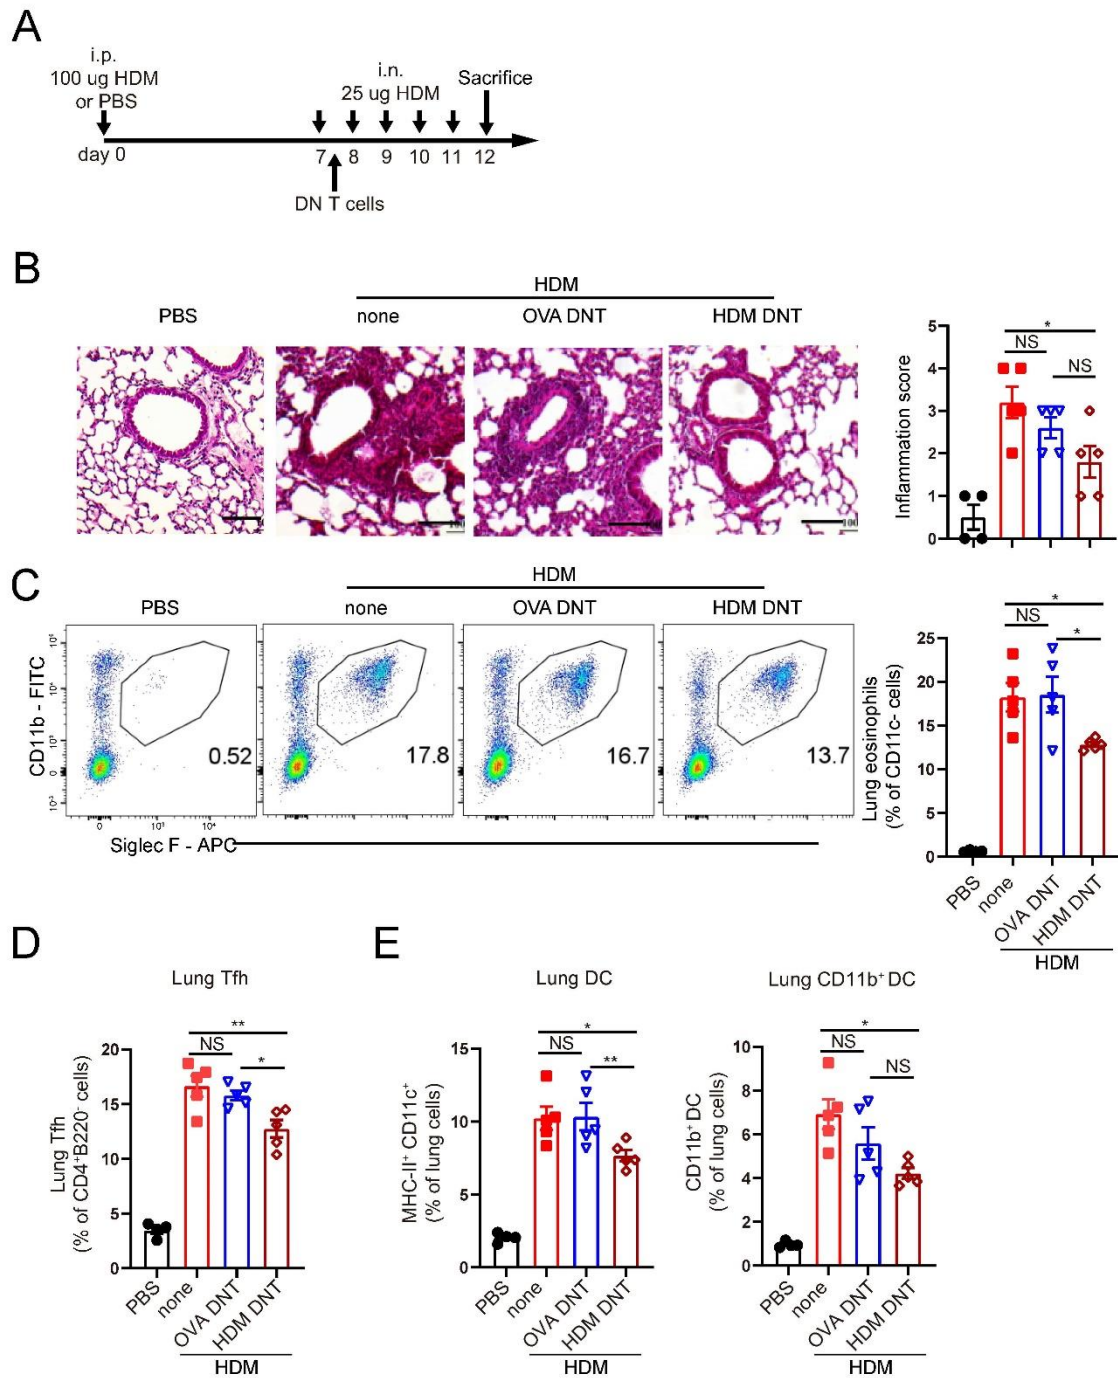

**Supplementary Figure 4. The antigen specific therapeutic effect of DNTs in HDM-induced airway inflammation.**

(A) Schematic representation of the experimental procedure. BALB/c mice were

sensitized by i.p. injection of 100  $\mu$ g HDM extract. Sensitized mice were administered intranasally with 25  $\mu$ g of HDM extract daily for 5 days from day 7. *Ex vivo* converted HDM DNT cells or OVA DNT cells ( $2 \times 10^6$ ) were transferred to mice intravenously after the first i.n. challenge. **(B)** Lung sections were stained with H&E to measure the infiltrated inflammatory cells (Scale bars, 100  $\mu$ m). The proportions of **(C)** eosinophils (Siglec F<sup>+</sup>CD11b<sup>+</sup>CD11c<sup>-</sup>), **(D)**Tfh cells (CD4<sup>+</sup>B220<sup>-</sup>CXCR5<sup>+</sup>PD-1<sup>+</sup>) and **(E)** DCs (CD11c<sup>+</sup>MHC-II<sup>+</sup>) and CD11b<sup>+</sup> DCs (CD11b<sup>+</sup>CD11c<sup>+</sup>MHC-II<sup>+</sup>) in the lung were assessed by flow cytometry. Data are shown as the mean  $\pm$  SEM; n = 4-5 mice per group. One-way ANOVA was used to calculate significance. \* $P < 0.05$ ; \*\* $P < 0.01$ .

Supplementary Figure 5

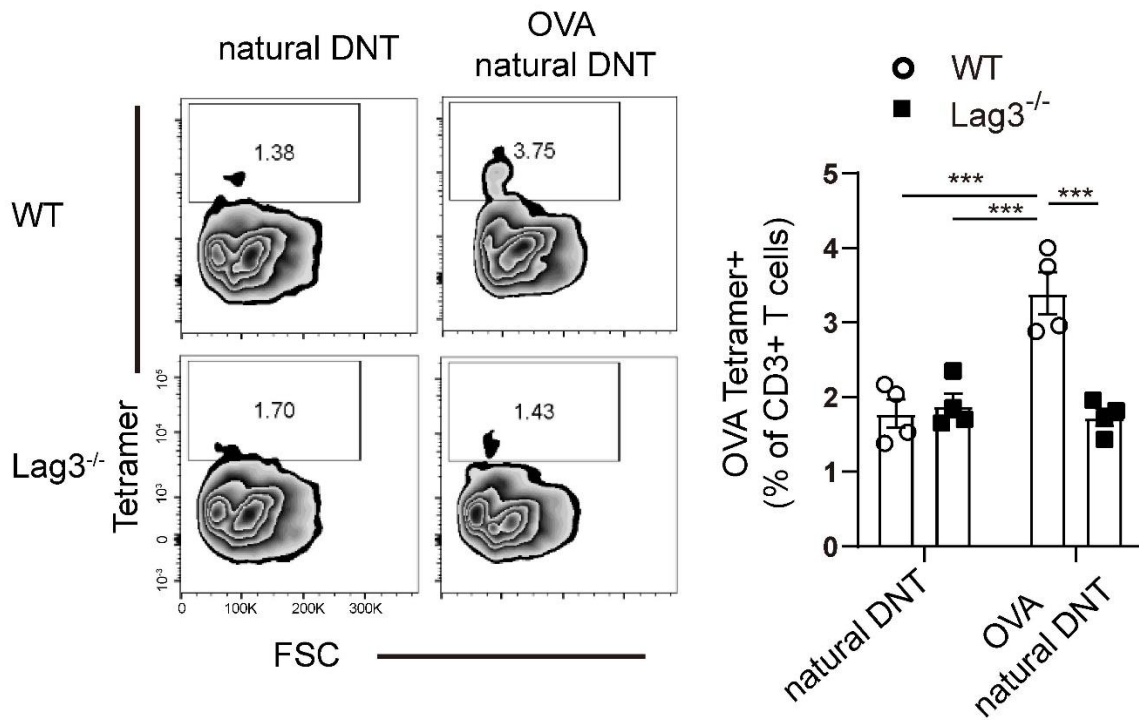

**Supplementary Figure 5. OVA-specific natural DNT cells were assessed by OVA-Tetramer-PE staining.** Naïve natural DNT cells from WT or Lag3<sup>-/-</sup> mice were cocultured with C57BL/6J mDCs, 50 ng/ml rIL-2 and 1 µg/ml OVA<sub>329-339</sub> for 5 days. Activated and freshly isolated naïve WT or Lag3<sup>-/-</sup> DNT cells were stained with OVA-specific MHC class II tetramer (I-A<sup>b</sup> OVA<sub>323-339</sub> tetramers). OVA-Tetramer<sup>+</sup> Nature DNT (CD3<sup>+</sup>OVA-Tetramer<sup>+</sup>) were assessed by flow cytometry. Data are shown as the mean ± SEM; n = 4 mice per group. One-way ANOVA was used to calculate significance. \*\*\**P* < 0.001.

**Supplementary Table 1. Primers used for real-time PCR**

| Gene name      | Sequence (5'→3')                                   |
|----------------|----------------------------------------------------|
| <i>Lag3</i>    | F: GAGGCCATCTCGTTCTCGTT<br>R: CCGGAAATGGCTGAATCCCA |
| <i>Prfl</i>    | F: CTGCCACTCGGTCAGAATG<br>R: CGGAGGGTAGTCACATCCAT  |
| <i>Fasl</i>    | F: TGAATTACCCATGTCCCCAG<br>R: AAAGTACCCTGGAGGAGCC  |
| <i>β-actin</i> | F: CTGTCCCTGTATGCCTCTG<br>R: ATGTCACGCACGATTTCC    |

F, Forward; R, reverse.
